# Supplementary material for: Vaccine Hesitancy in Saudi Arabia: A Cross-Sectional Study
Source: MDPI journal article supplement (doi:10.3390/tropicalmed7040060), 2022-04-12
Supplement: s1 [file s1]

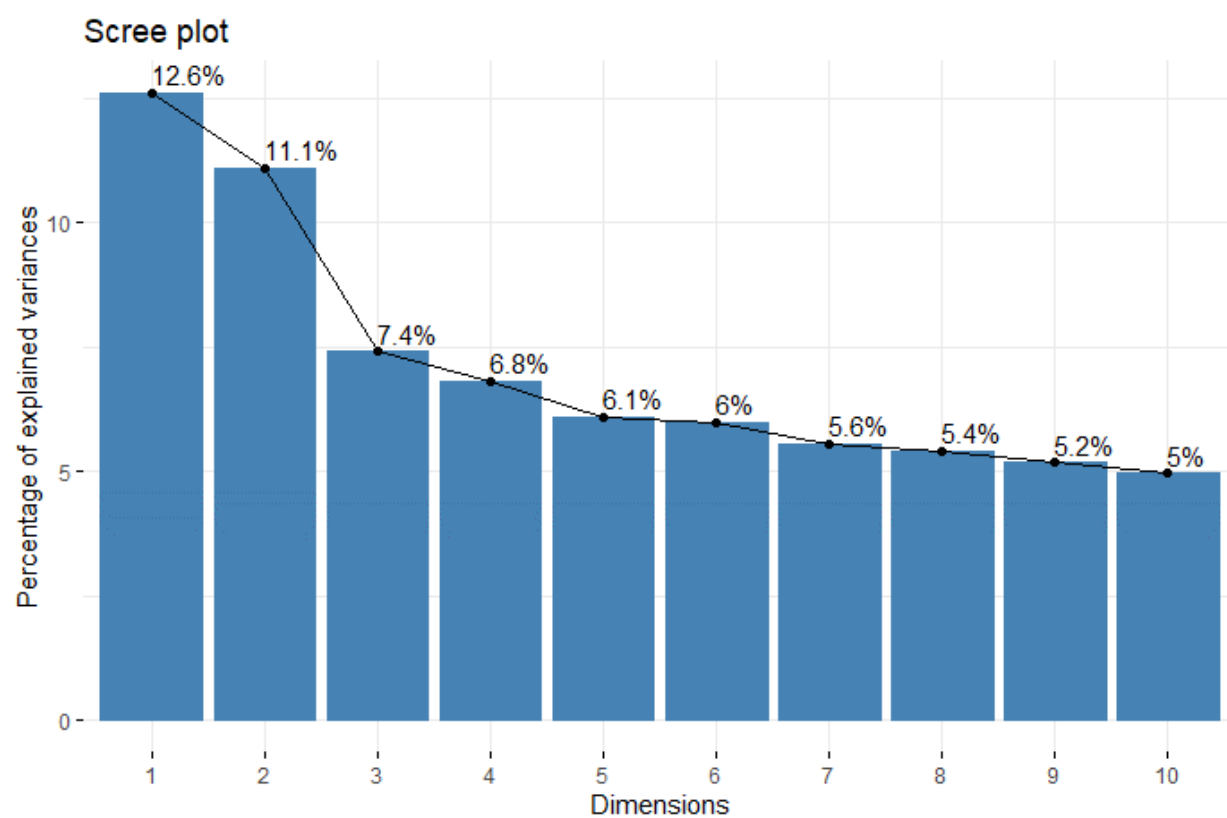

**Figure S1.** Contextual Influence Components Scree Plot.

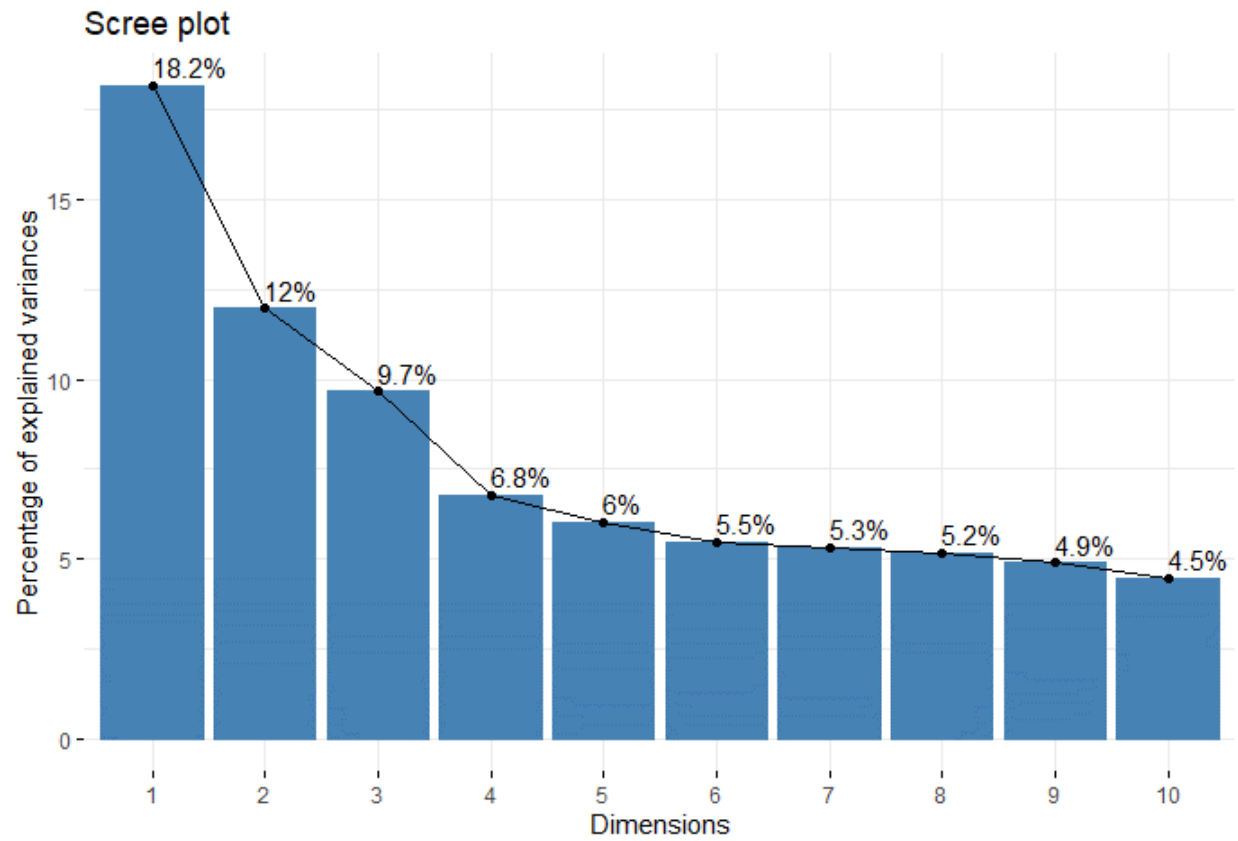

Figure S2. Individual and group influences Components Scree Plot.

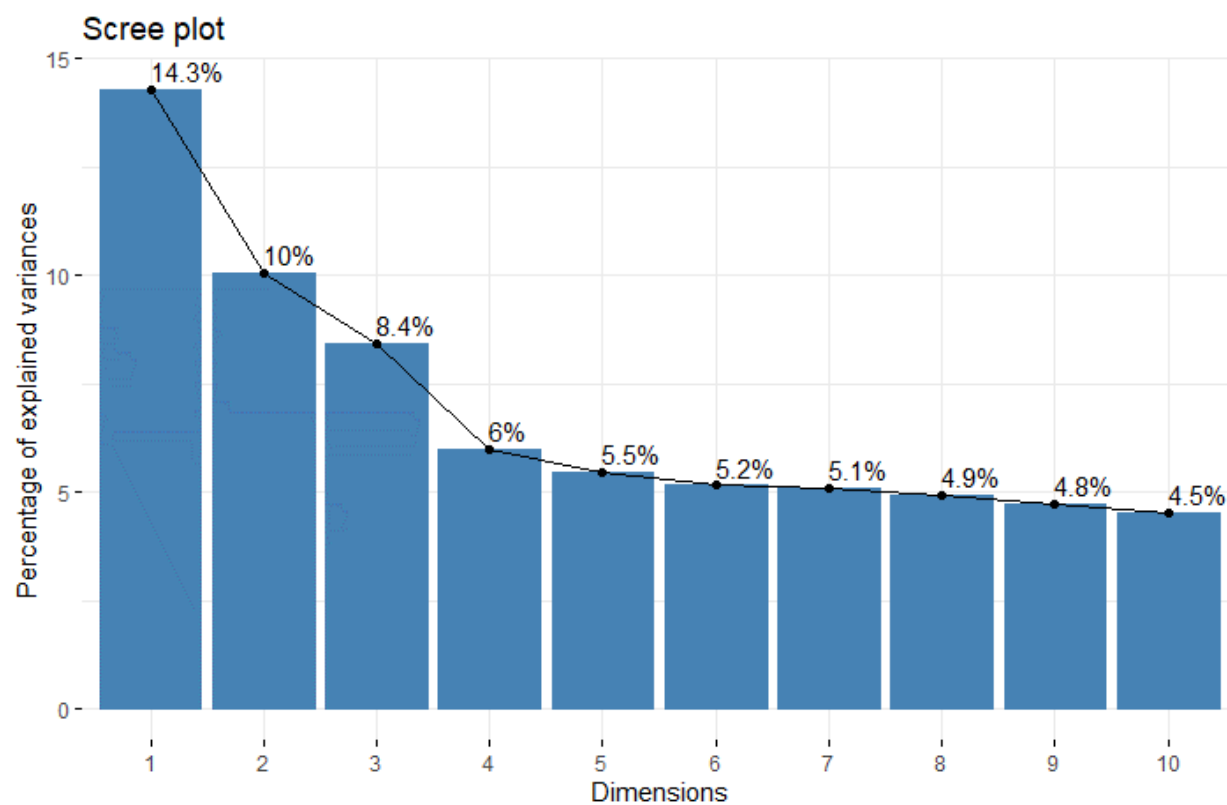

**Figure S3.** Vaccine/vaccination specific issues Components Scree Plot.

**Table S1.** Health care professional questionnaire.

| <b>SPECIALITY:</b>   |             |
|----------------------|-------------|
| Endocrinologist      | 40 (8.0%)   |
| Family medicine      | 3 (0.6%)    |
| General practitioner | 76 (15.2%)  |
| Gynecologist         | 40 (8.0%)   |
| Pediatrician         | 158 (31.6%) |
| Pulmonologist        | 42 (8.4%)   |
| Vaccine nurse        | 141 (28.2%) |

**Type of vaccination site:**

|  |
|--|
|  |
|--|

|                                                     |               |
|-----------------------------------------------------|---------------|
| MOH Hospital                                        | 32 (6.4%)     |
| Other Government hospital                           | 125 (25.0%)   |
| PHC                                                 | 156 (31.2%)   |
| Private facility                                    | 187 (37.4%)   |
| <b>Position of person interviewed:</b>              |               |
| Adult specialist                                    | 122 (24.4%)   |
| General Practitioner                                | 78 (15.6%)    |
| Pediatrician                                        | 150 (30.0%)   |
| Vaccine nurse                                       | 150 (30.0%)   |
| <b>Fulfilling this position for how long</b>        |               |
| Min.-Max.                                           | 2.0- 39.0     |
| Mean (SD)                                           | 15.4 (7.3)    |
| <b>Responsibilities related to vaccination</b>      |               |
| I administer vaccines                               | 104 (20.8%)   |
| I manage the vaccination clinic                     | 120 (24.0%)   |
| I recommend / prescribe vaccines                    | 276 (55.2%)   |
| <b>Main target groups</b>                           |               |
| Children                                            | 357 (71.4%)   |
| Adolescents                                         | 142 (28.4%)   |
| Adults                                              | 296 (59.2%)   |
| <b>Number of those who receive vaccines monthly</b> |               |
| children(Min.-Max.)                                 | 0 – 2000      |
| Mean (SD)                                           | 222.4 (354.8) |
| Adolescents (Min.-Max).                             | 0 – 400       |

|                                                         |              |
|---------------------------------------------------------|--------------|
| Mean (SD)                                               | 12.8 (41.9)  |
| Adults (Min.-Max).                                      | 0 – 1500     |
| Mean (SD)                                               | 55.3 (171.4) |
| <b>Facility's vaccination coverage for vaccines</b>     |              |
| All routine vaccines                                    | 357 (71.4%)  |
|                                                         | 15 (3.0%)    |
| <b>All routine vaccines except</b>                      |              |
| HPV vaccine                                             | 180 (36.0%)  |
| Influenza vaccine                                       | 329 (65.8%)  |
| Typhoid vaccine                                         | 162 (32.4%)  |
| Hepatitis A vaccine for adults                          | 204 (40.8%)  |
| Meningococcal vaccine                                   | 302 (60.4%)  |
| Varicella Zoster Vaccine                                | 217 (43.4%)  |
| Tetanus Vaccine                                         | 248 (49.6%)  |
| Rabies vaccine                                          | 183 (36.6%)  |
| Polyvalent pneumococcal vaccine (Pneumo23)              | 202 (40.4%)  |
| <b>All routine vaccines except: (n=15)</b>              |              |
| BCG                                                     | 8 (1.6%)     |
| DTaP                                                    | 1 (0.2%)     |
| Hepatitis A, MMR                                        | 2 (0.4%)     |
| HPV vaccine                                             | 2 (0.4%)     |
| Rota and meningococcal                                  | 2 (0.4%)     |
| <b>Dropout rate from children vaccination last year</b> |              |
| Dropout rate                                            | 257 (51.4%)  |
| Does not know                                           | 243 (48.6%)  |
| Min.-Max.                                               | 0-245        |

|                                                                                   |             |
|-----------------------------------------------------------------------------------|-------------|
| Mean (SD)                                                                         | 17.7 (17.4) |
| <b>Are you aware of the national vaccination schedule for infants?</b>            |             |
| Does not know                                                                     | 123 (24.6%) |
| Knows                                                                             | 377 (75.4%) |
| <b>Availability of vaccines daily</b>                                             |             |
| All vaccines are available all the days                                           | 322 (64.4%) |
| All vaccines are available in specific days                                       | 101 (20.2%) |
| Not all vaccines are available                                                    | 24 (4.8%)   |
| <b>Availability of cold chain capacities</b>                                      |             |
| No                                                                                | 18 (3.6%)   |
| Yes                                                                               | 482 (96.4%) |
| <b>Availability of enough staff for vaccination</b>                               |             |
| Don't know                                                                        | 62 (12.4%)  |
| No                                                                                | 65 (13.0%)  |
| Yes                                                                               | 373 (74.6%) |
| <b>Outreach sessions, e.g., school campaigns and home campaigns</b>               |             |
| No                                                                                | 330 (66.0%) |
| Yes                                                                               | 170 (34.0%) |
| <b>Are all planned vaccination sessions outside the facility held as planned?</b> |             |
| No                                                                                | 7 (1.4%)    |
| Yes                                                                               | 163 (32.6%) |
| <b>Estimated percentage of vaccinations given outside the facility</b>            |             |

|            |             |
|------------|-------------|
| Don't know | 335 (67.0%) |
| Percentage | 165 (33.0%) |
| Mean (SD)  | 24.3 (21.6) |

#### **Feeling of most parents about vaccination**

|                               |             |
|-------------------------------|-------------|
| Accept all                    | 352 (70.4%) |
| Accept but unsure / concerned | 72 (14.4%)  |
| Don't know                    | 70 (14.0%)  |
| Refuse / delay some           | 6 (1.2%)    |

#### **Facility provide information on vaccines to the public**

|     |             |
|-----|-------------|
| No  | 124 (24.8%) |
| Yes | 376 (75.2%) |

#### **How?**

|                               |             |
|-------------------------------|-------------|
| Posters                       | 147 (29.4%) |
| Brochures                     | 127 (25.4%) |
| Awareness campaigns           | 49 (9.8%)   |
| Flyers                        | 49 (9.8%)   |
| Social media                  | 26 (5.2%)   |
| Hospital website              | 24 (4.8%)   |
| Parents education             | 22 (4.4%)   |
| Health applications           | 17 (3.4%)   |
| Videos                        | 17 (3.4%)   |
| Leaflets and booklets         | 14 (2.8%)   |
| Mobile messages               | 11 (2.2%)   |
| Screens and TV advertisements | 9 (1.8%)    |
| Cards, newspaper, panniers    | 6 (1.2%)    |

|                                                                                |             |
|--------------------------------------------------------------------------------|-------------|
| <b>The presence of community leaders and groups in promoting immunization:</b> |             |
| No                                                                             | 369 (73.8%) |
| Yes                                                                            | 131 (26.2%) |

|                                                                                                        |             |
|--------------------------------------------------------------------------------------------------------|-------------|
| <b>The presence of a system for identifying specific infants who are behind in their vaccinations:</b> |             |
| Don't know                                                                                             | 102 (20.4%) |
| No                                                                                                     | 232 (46.4%) |
| Yes                                                                                                    | 166 (33.2%) |

|                                                                             |             |
|-----------------------------------------------------------------------------|-------------|
| <b>What proportion of time would you estimate you spend on vaccination?</b> |             |
| Min. – Max.                                                                 | 1-100       |
| Mean (SD)                                                                   | 34.4 (34.1) |

|                                                   |             |
|---------------------------------------------------|-------------|
| <b>How important is your work in vaccination?</b> |             |
| Extremely important                               | 323 (64.6%) |
| Somewhat important                                | 18 (3.6%)   |
| Very important                                    | 159 (31.8%) |

|                                                                           |             |
|---------------------------------------------------------------------------|-------------|
| <b>What do you normally say to a mother before vaccinating her child:</b> |             |
| Number and type of vaccine/s the child will receive                       | 295 (59.0%) |
| Information about the vaccine/s                                           | 289 (57.8%) |
| Information about the disease/s                                           | 200 (40.0%) |
| Information about possible side effects and how to deal with              | 307 (61.4%) |
| Nothing                                                                   | 10 (2.0%)   |
| Other (n=31)                                                              | 31 (6.2%)   |
| Allergy or diseases against any medicine                                  | 2 (0.4%)    |
| Information about next visit                                              | 2 (0.4%)    |
| Answering their questions                                                 | 2 (0.4%)    |
| Appointment of vaccine                                                    | 8 (1.6%)    |



|                                        |           |
|----------------------------------------|-----------|
| Asking child history if he has disease | 7 (1.4%)  |
| period of vaccines                     | 2 (0.4%)  |
| Taking family history                  | 11 (2.2%) |

**What do you normally say to a mother after vaccinating her child:**

|                                                              |             |
|--------------------------------------------------------------|-------------|
| Information about possible side effects and how to deal with | 308 (61.6%) |
| Information about the next visit                             | 310 (62.0%) |
| Nothing                                                      | 37 (7.4%)   |
| Other (n=8)                                                  | 8 (1.6%)    |
| Benefits of vaccine                                          | 4 (0.8%)    |
| Giving full information about vaccine                        | 2 (0.4%)    |
| How he can eat, drink, how to deal with medications          | 2 (0.4%)    |
| Make some medication if there are bad things happens         | 1 (0.2%)    |
| Side effects                                                 | 1 (0.2%)    |

**Any factors that make your conversations with caregivers at the time of vaccination difficult:**

|     |             |
|-----|-------------|
| No  | 414 (82.8%) |
| Yes | 86 (17.2%)  |

**Please tell me about these factors:**

|                                                       |            |
|-------------------------------------------------------|------------|
| Limited time available                                | 52 (10.4%) |
| There are too many children to deal with              | 37 (7.4%)  |
| Limited knowledge about vaccines and related diseases | 13 (2.6%)  |
| Lack of training / orientation                        | 10 (2.0%)  |
| Other                                                 | 11 (2.2%)  |
| Language barriers                                     | 8 (1.6%)   |
| Languages barriers for Expats                         | 1 (0.2%)   |

**Discussing immunization and vaccination services in communities:**

|  |  |
|--|--|
|  |  |
|--|--|

|     |             |
|-----|-------------|
| No  | 279 (55.8%) |
| Yes | 221 (44.2%) |

### **Concerns from caregivers about vaccinations**

|                                               |             |
|-----------------------------------------------|-------------|
| Concerns about pain                           | 208 (41.6%) |
| Concerns about other effects                  | 431 (86.2%) |
| Concerns about infection                      | 110 (22.0%) |
| Concerns about getting sick after vaccination | 266 (53.2%) |
| Other                                         | 13 (2.6%)   |

### **Other (n=13)**

|                                          |          |
|------------------------------------------|----------|
| Doubts about vaccination benefits        | 5 (1.0%) |
| Connecting some disease with vaccine     | 3 (0.6%) |
| Fear of vaccination                      | 2 (0.4%) |
| Allergy                                  | 1 (0.2%) |
| Useless to give vaccine                  | 1 (0.2%) |
| Vaccines that might may affect pregnancy | 1 (0.2%) |

### **How do you normally respond to these concerns about pain?**

|                                                                           |             |
|---------------------------------------------------------------------------|-------------|
| Explore their concern and then respond                                    | 289 (57.8%) |
| Provide information about vaccines                                        | 291 (58.2%) |
| Provide information about possible side effects and how to deal with them | 406 (81.2%) |
| Show empathy and reassure the parent/caregiver                            | 208 (41.6%) |
| Other                                                                     | 14 (2.8%)   |
| Recommended some medication                                               | 12 (2.4%)   |
| Talk about the importance of vaccine                                      | 1 (0.2%)    |
| Announcing the importance of vaccine                                      | 1 (0.2%)    |

| <b>What are the main reasons why some children in your area have incomplete or delayed vaccinations?</b> |             |
|----------------------------------------------------------------------------------------------------------|-------------|
| Fear of pain                                                                                             | 62 (12.4%)  |
| Fear of other side effects                                                                               | 202 (40.4%) |
| Fear of infection                                                                                        | 49 (9.8%)   |
| Negative media and public communication                                                                  | 119 (23.8%) |
| Religion, culture barriers                                                                               | 43 (8.6%)   |
| Lack of accessibility of services                                                                        | 73 (14.6%)  |
| Lack of trust in authorities                                                                             | 16 (3.2%)   |
| Lack of knowledge and awareness                                                                          | 236 (47.2%) |
| Poor quality health service experience                                                                   | 30 (6.0%)   |
| Costs associated with vaccination                                                                        | 42 (8.4%)   |
| Knowledge/attitudes of healthcare professionals                                                          | 36 (7.2%)   |
| Don't know                                                                                               | 70 (14.0%)  |
| Other                                                                                                    | 135 (27.0%) |
| <b>Other:</b>                                                                                            |             |
| Travelling parents                                                                                       | 21 (4.2%)   |
| Irresponsible parents and forget the dates of next dose                                                  | 21 (4.2%)   |
| Divorced parents                                                                                         | 17 (3.4%)   |
| COVID 19 conditions                                                                                      | 12 (2.4%)   |
| Live in remote area                                                                                      | 11 (2.2%)   |
| Busy parents                                                                                             | 9 (1.8%)    |
| Have no ID                                                                                               | 9 (1.8%)    |
| Irresponsible parents                                                                                    | 8 (1.6%)    |
| Fear from the vaccine                                                                                    | 7 (1.4%)    |
| Sick baby                                                                                                | 6 (1.2%)    |
| Parents don't know the importance of the vaccine                                                         | 5 (1.0%)    |
| Family problems                                                                                          | 5 (1.0%)    |

|                                   |          |
|-----------------------------------|----------|
| Transportation difficulty         | 3 (0.6%) |
| Wrong information on social media | 2 (0.4%) |
| Allergy of the patient            | 1 (0.2%) |

**What could your health facility do to improve its immunization coverage:**

|                                                                                                   |             |
|---------------------------------------------------------------------------------------------------|-------------|
| Sharing data on diseases that can be prevented by vaccination                                     | 382 (76.4%) |
| Sharing information on safety and risk                                                            | 325 (65.0%) |
| Explaining why vaccines are recommended and when                                                  | 406 (81.2%) |
| Building trust in national decision-making processes                                              | 203 (40.6%) |
| Offer the time, space, and the environment for caregivers to digest information and ask questions | 117 (23.4%) |
| Other                                                                                             | 26 (5.2%)   |
| Awareness campaigns and advertising                                                               | 2 (0.4%)    |
| Communications                                                                                    | 3 (0.6%)    |
| Community education                                                                               | 1 (0.2%)    |
| Keep in touch with the mothers                                                                    | 2 (0.4%)    |
| Media campaigns                                                                                   | 1 (0.2%)    |
| Reminder for parents for vaccination time                                                         | 9 (1.8%)    |
| Social campaigns                                                                                  | 1 (0.2%)    |
| Social media                                                                                      | 1 (0.2%)    |
| Sponsors on social media                                                                          | 1 (0.2%)    |
| Vaccination clinic                                                                                | 1 (0.2%)    |
| We have target                                                                                    | 1 (0.2%)    |
| We have weekly data sending to the MOH                                                            | 3 (0.6%)    |

**To what extent do you agree with the following statements related to your day to day work:**

|                                          |           |
|------------------------------------------|-----------|
| <b>I have too many responsibilities:</b> |           |
| Completely disagree                      | 10 (2.0%) |
| Somewhat disagree                        | 9 (1.8%)  |

|                            |             |
|----------------------------|-------------|
| Neither agree nor disagree | 21 (4.2%)   |
| Somewhat agree             | 139 (27.8%) |
| Completely agree           | 320 (64.0%) |
| Don't know                 | 1 (0.2%)    |

**I have to attend to too many mothers and children everyday:**

|                            |             |
|----------------------------|-------------|
| Completely disagree        | 59 (11.8%)  |
| Somewhat disagree          | 23 (4.6%)   |
| Neither agree nor disagree | 33 (6.6%)   |
| Somewhat agree             | 161 (32.2%) |
| Completely agree           | 173 (34.6%) |
| Don't know                 | 51 (10.2%)  |

**I have far too much to do to be able to explain everything carefully to caregivers:**

|                            |             |
|----------------------------|-------------|
| Completely disagree        | 68 (13.6%)  |
| Somewhat disagree          | 57 (11.4%)  |
| Neither agree nor disagree | 63 (12.6%)  |
| Somewhat agree             | 160 (32.0%) |
| Completely agree           | 141 (28.2%) |
| Don't know                 | 11 (2.2%)   |

**I have to spend too much time writing in registers and forms:**

|                            |             |
|----------------------------|-------------|
| Completely disagree        | 78 (15.6%)  |
| Somewhat disagree          | 77 (15.4%)  |
| Neither agree nor disagree | 91 (18.2%)  |
| Somewhat agree             | 144 (28.8%) |
| Completely agree           | 108 (21.6%) |
| Don't know                 | 2 (0.4%)    |

---

**I have to deal with too many caregivers who don't act responsibly for example not showing up for appointments losing their children health cards and not following instructions:**

---

|                            |             |
|----------------------------|-------------|
| Completely disagree        | 76 (15.2%)  |
| Somewhat disagree          | 70 (14.0%)  |
| Neither agree nor disagree | 82 (16.4%)  |
| Somewhat agree             | 128 (25.6%) |
| Completely agree           | 91 (18.2%)  |
| Don't know                 | 53 (10.6%)  |

---

**I need more training and opportunities for professional advancement:**

|                            |             |
|----------------------------|-------------|
| Completely disagree        | 175 (35.0%) |
| Somewhat disagree          | 58 (11.6%)  |
| Neither agree nor disagree | 58 (11.6%)  |
| Somewhat agree             | 138 (27.6%) |
| Completely agree           | 66 (13.2%)  |
| Don't know                 | 5 (1.0%)    |

---

**I need more supervision that is not just criticism but to help me do my job better:**

|                            |             |
|----------------------------|-------------|
| Completely disagree        | 216 (43.2%) |
| Somewhat disagree          | 110 (22.0%) |
| Neither agree nor disagree | 90 (18.0%)  |
| Somewhat agree             | 43 (8.6%)   |
| Completely agree           | 38 (7.6%)   |
| Don't know                 | 3 (0.6%)    |

---

**I need more vaccine so I can open a vial for one or a few children as I'm supposed to do:**

|                            |             |
|----------------------------|-------------|
| Completely disagree        | 115 (23.0%) |
| Somewhat disagree          | 69 (13.8%)  |
| Neither agree nor disagree | 122 (24.4%) |

---

|                  |            |
|------------------|------------|
| Somewhat agree   | 64 (12.8%) |
| Completely agree | 49 (9.8%)  |
| Don't know       | 81 (16.2%) |

**I am not adequately supported and want assurances that the Ministry of Health will defend me against undeserved criticism for example if a child gets sick after vaccination:**

|                            |             |
|----------------------------|-------------|
| Completely disagree        | 145 (29.0%) |
| Somewhat disagree          | 71 (14.2%)  |
| Neither agree nor disagree | 94 (18.8%)  |
| Somewhat agree             | 57 (11.4%)  |
| Completely agree           | 72 (14.4%)  |
| Don't know                 | 61 (12.2%)  |

**Vaccinating mildly or moderately sick or underweight children may lead to the health worker being blamed by the parents and or the health system if the child's condition worsens:**

|                            |             |
|----------------------------|-------------|
| Completely disagree        | 113 (22.6%) |
| Somewhat disagree          | 58 (11.6%)  |
| Neither agree nor disagree | 77 (15.4%)  |
| Somewhat agree             | 86 (17.2%)  |
| Completely agree           | 84 (16.8%)  |
| Don't know                 | 82 (16.4%)  |

**Opening a 10 dose or 20 dose vials for one or two children or vaccinating a child from another district or sub district will waste vaccine and lead to stock outs:**

|                            |             |
|----------------------------|-------------|
| Completely disagree        | 77 (15.4%)  |
| Somewhat disagree          | 23 (4.6%)   |
| Neither agree nor disagree | 66 (13.2%)  |
| Somewhat agree             | 88 (17.6%)  |
| Completely agree           | 166 (33.2%) |
| Don't know                 | 80 (16.0%)  |

|                                                                                                                |             |
|----------------------------------------------------------------------------------------------------------------|-------------|
| <b>Giving multiple vaccinations on the same visit may lead to worse side effects which will upset parents:</b> |             |
| Completely disagree                                                                                            | 166 (33.2%) |
| Somewhat disagree                                                                                              | 75 (15.0%)  |
| Neither agree nor disagree                                                                                     | 93 (18.6%)  |
| Somewhat agree                                                                                                 | 68 (13.6%)  |
| Completely agree                                                                                               | 37 (7.4%)   |
| Don't know                                                                                                     | 61 (12.2%)  |

|                                                                                           |             |
|-------------------------------------------------------------------------------------------|-------------|
| <b>What Health Authorities may do to help improve immunization coverage of facilities</b> |             |
| Awareness campaigns and information about the latest vaccination studies                  | 204 (40.8%) |
| Social media                                                                              | 88 (17.6%)  |
| Parents Education about vaccines                                                          | 49 (9.8%)   |
| Send messages to parents with the next appointments                                       | 48 (9.6%)   |
| Availability of the vaccines                                                              | 46 (9.2%)   |
| Stuff availability                                                                        | 28 (5.6%)   |
| Stuff education                                                                           | 12 (2.4%)   |
| Posters                                                                                   | 4 (0.8%)    |
| Brochures                                                                                 | 3 (0.6%)    |

**Table S2.** Exit interviews with caregivers.

|                                          |            |
|------------------------------------------|------------|
| <b>Type of Vaccination Site: (n=119)</b> |            |
| Hospital                                 | 0 (0.0%)   |
| Primary Healthcare center                | 119 (100%) |
| <b>Sector: (n=119)</b>                   |            |
| Government facility                      | 119 (100%) |
| Private facility                         | 0 (0.0%)   |
| Other                                    | 0 (0.0%)   |



|                                                              |                     |
|--------------------------------------------------------------|---------------------|
| <b>Are you willing to answer a few questions?</b>            |                     |
| Yes                                                          | 119 (100%)          |
| No                                                           | 0 (0.0%)            |
| <b>Why did you come here today?</b>                          |                     |
| Child's vaccination                                          | 119 (100%)          |
| Other                                                        | 0 (0.0%)            |
| <b>Did the child receive one or more vaccinations today?</b> |                     |
| Yes                                                          | 119 (100%)          |
| No                                                           | 0 (0.0%)            |
| <b>Why did you come?</b>                                     |                     |
| Scheduled date for vaccination                               | 119 (100%)          |
| Not apply                                                    | 0 (0.0%)            |
| Nothing                                                      | 0 (0.0%)            |
| <b>Q1 - How was your waiting experience today?</b>           |                     |
| Bad                                                          | 0 (0.0%)            |
| Fair                                                         | 1 (0.84%)           |
| Good                                                         | 1 (0.84%)           |
| Very Good                                                    | 41 (34.5%)          |
| Excellent                                                    | 76 (63.9%)          |
| <b>Q1 - How was your waiting experience today?</b>           |                     |
| B2B                                                          | 1 (0.84%)           |
| Neutral                                                      | 1 (0.84%)           |
| T2B                                                          | 117<br>(98.3%)      |
| <b>Q2 - How long did you wait? (Minutes)</b>                 |                     |
| Minimum to maximum                                           | 3 – 60<br>Minutes   |
| Mean $\pm$ SD                                                | 11.28 $\pm$<br>6.31 |

|                                                                                                                                                 |                 |
|-------------------------------------------------------------------------------------------------------------------------------------------------|-----------------|
| Median (IQR)                                                                                                                                    | 10 (9.0 – 15.0) |
| <b>Q3 - What vaccinations did your child receive today?</b>                                                                                     |                 |
| Know                                                                                                                                            | 73 (61.3%)      |
| Do not know                                                                                                                                     | 46 (38.7%)      |
| <b>All vaccinations that the child received: (n=73)</b>                                                                                         |                 |
| DPT vaccine                                                                                                                                     | 47 (39.5%)      |
| Poliomyelitis                                                                                                                                   | 34 (28.6%)      |
| Haemophilus influenza                                                                                                                           | 32 (26.9%)      |
| Hepatic inflammation                                                                                                                            | 28 (23.5%)      |
| Measles                                                                                                                                         | 18 (15.1%)      |
| Meningitis                                                                                                                                      | 16 (13.4%)      |
| Meningococcal vaccine                                                                                                                           | 13 (10.9%)      |
| Chickenpox                                                                                                                                      | 8 (6.7%)        |
| Rotavirus vaccine                                                                                                                               | 7 (5.9%)        |
| Oral Poliomyelitis vaccine                                                                                                                      | 3 (2.5%)        |
| Tuberculosis                                                                                                                                    | 2 (1.7%)        |
| Bacterial infection                                                                                                                             | 1 (0.84%)       |
| Mumps                                                                                                                                           | 1 (0.84%)       |
| Streptococcus bacteria                                                                                                                          | 0 (0.0%)        |
| <b>Q4 - Can I please look at your child's vaccination card for a moment to see if what you recall agrees with what the health worker wrote?</b> |                 |
| No                                                                                                                                              | 4 (3.3%)        |
| Yes                                                                                                                                             | 115 (96.7%)     |
| <b>What the health worker wrote (or did not write) and on agreement with caregiver's recall: (n=115)</b>                                        |                 |
| The seal                                                                                                                                        | 60 (50.4%)      |
| Signature of the health worker & Stamp                                                                                                          | 47 (39.5%)      |
| Next dose date                                                                                                                                  | 59 (49.6%)      |

|                                                                                                                |             |
|----------------------------------------------------------------------------------------------------------------|-------------|
| DPT bacterial vaccine                                                                                          | 1 (0.84%)   |
| Haemophilus influenza                                                                                          | 1 (0.84%)   |
| Baby's weight                                                                                                  | 16 (13.4%)  |
| Following up the child's growth                                                                                | 3 (2.5%)    |
| Writing down that the dose was taken as scheduled                                                              | 7 (5.9%)    |
| Dosage date                                                                                                    | 7 (5.9%)    |
| The child who was infected with the Coronavirus, can't be vaccinated now, until after three months of recovery | 1 (0.84%)   |
| Not apply                                                                                                      | 1 (0.84%)   |
| Nothing                                                                                                        | 50 (42.0%)  |
| <b>Q5 - Did your child receive all of the vaccinations you came for?</b>                                       |             |
| Yes                                                                                                            | 118 (99.2%) |
| No                                                                                                             | 1 (0.84%)   |
| <b>Reasons of not receiving vaccinations: (n=1)</b>                                                            |             |
| My child was infected with Coronavirus and must be vaccinated after 3 months                                   | 1 (0.84%)   |
| <b>Q6 - How did the vaccinator treat you today?</b>                                                            |             |
| Bad                                                                                                            | 0 (0.0%)    |
| Fair                                                                                                           | 0 (0.0%)    |
| Good                                                                                                           | 0 (0.0%)    |
| Very Good                                                                                                      | 30 (25.2%)  |
| Excellent                                                                                                      | 89 (74.8%)  |
| <b>Q7 - Do you need to bring back your child for more vaccinations?</b>                                        |             |
| Yes                                                                                                            | 101 (84.9%) |
| No                                                                                                             | 17 (14.3%)  |
| Not Sure                                                                                                       | 1 (0.84%)   |
| <b>Q8: If yes, do you intend to bring your child back then? (n=101)</b>                                        |             |
| Yes                                                                                                            | 101 (100%)  |
| No                                                                                                             | 0 (0.0%)    |

|                                                                                                           |             |
|-----------------------------------------------------------------------------------------------------------|-------------|
| Not Sure                                                                                                  | 0 (0.0%)    |
| <b>Q9 - Did the vaccinator tell you about how your child might feel after the vaccination?</b>            |             |
| Yes                                                                                                       | 97 (81.5%)  |
| No                                                                                                        | 22 (18.5%)  |
| <b>What did they say to do if your child has some discomfort after the vaccination? (Multiple answer)</b> |             |
| Give antipyretic                                                                                          | 65 (54.6%)  |
| Make compresses                                                                                           | 21 (17.6%)  |
| Give analgesic.                                                                                           | 31 (26.1%)  |
| Give a suppository                                                                                        | 10 (8.4%)   |
| Check the temperature frequently                                                                          | 6 (5.0%)    |
| Not apply                                                                                                 | 3 (2.5%)    |
| Nothing                                                                                                   | 0 (0.0%)    |
| <b>Q10 - Did the vaccinator say anything about your child's vaccination card/health booklet?</b>          |             |
| Yes                                                                                                       | 53 (44.5%)  |
| No                                                                                                        | 66 (55.5%)  |
| <b>Q11 - Do you have any questions about vaccination in general or about today's vaccinations?</b>        |             |
| Yes                                                                                                       | 29 (24.4%)  |
| No                                                                                                        | 90 (75.6%)  |
| <b>Did you ask the health worker? (n=29)</b>                                                              |             |
| Yes                                                                                                       | 29 (100%)   |
| <b>Q12 - Is there anything else you would like to mention about your vaccination experience today?</b>    |             |
| The nurse is excellent                                                                                    | 1 (0.84%)   |
| Nothing                                                                                                   | 118 (99.2%) |
